# Supplementary material
Source: publisher figshare collection journal article supplement (https://asha.figshare.com/ndownloader/files/26019458)
Supplement: Supplementary file 1 [file 26019458]

## **Supplemental Material S1.**

### **Blank Example Data Collection Documents**

### Intentional Communication

Date: \_\_\_\_\_ Start time: \_\_\_\_\_ Stop time: \_\_\_\_\_

Activity: \_\_\_\_\_ Communication partner: \_\_\_\_\_

Setting: \_\_\_\_\_

Supports: \_\_\_\_\_

| Non-symbolic intentional communication | Single spoken (or signed) words | Spoken (or signed) phrases |
|----------------------------------------|---------------------------------|----------------------------|
|                                        |                                 |                            |
| Total:                                 | Total:                          | Total:                     |

Date: \_\_\_\_\_ Start time: \_\_\_\_\_ Stop time: \_\_\_\_\_

Activity: \_\_\_\_\_ Communication partner: \_\_\_\_\_

Setting: \_\_\_\_\_

Supports: \_\_\_\_\_

| Non-symbolic intentional communication | Single spoken (or signed) words | Spoken (or signed) phrases |
|----------------------------------------|---------------------------------|----------------------------|
|                                        |                                 |                            |
| Total:                                 | Total:                          | Total:                     |

## Consonant Inventory in Communication Acts

Date: \_\_\_\_\_ m n b or p d or t g or k /j/\* w l s /ʃ/ = Total  
  
Start: \_\_\_\_\_  
Stop: \_\_\_\_\_  
Activity: \_\_\_\_\_ Communication partner: \_\_\_\_\_  
Setting: \_\_\_\_\_

Date: \_\_\_\_\_ m n b or p d or t g or k /j/ w l s /ʃ/ = Total  
  
Start: \_\_\_\_\_  
Stop: \_\_\_\_\_  
Activity: \_\_\_\_\_ Communication partner: \_\_\_\_\_  
Setting: \_\_\_\_\_

Date: \_\_\_\_\_ m n b or p d or t g or k /j/ w l s /ʃ/ = Total  
  
Start: \_\_\_\_\_  
Stop: \_\_\_\_\_  
Activity: \_\_\_\_\_ Communication partner: \_\_\_\_\_  
Setting: \_\_\_\_\_

Date: \_\_\_\_\_ m n b or p d or t g or k /j/ w l s /ʃ/ = Total  
  
Start: \_\_\_\_\_  
Stop: \_\_\_\_\_  
Activity: \_\_\_\_\_ Communication partner: \_\_\_\_\_  
Setting: \_\_\_\_\_

Date: \_\_\_\_\_ m n b or p d or t g or k /j/ w l s /ʃ/ = Total  
  
Start: \_\_\_\_\_  
Stop: \_\_\_\_\_  
Activity: \_\_\_\_\_ Communication partner: \_\_\_\_\_  
Setting: \_\_\_\_\_

\*For simplicity, virgules (i.e., / /) are only included for consonants for which there may be confusion about the specific consonant being referenced (i.e., /j/ and /ʃ/).

## Responding to Joint Attention

Date: \_\_\_\_\_ Start: \_\_\_\_\_ Stop: \_\_\_\_\_

Activity: \_\_\_\_\_ Communication partner: \_\_\_\_\_

Setting: \_\_\_\_\_

Support: \_\_\_\_\_

\_\_\_\_ / \_\_\_\_

Date: \_\_\_\_\_ Start: \_\_\_\_\_ Stop: \_\_\_\_\_

Activity: \_\_\_\_\_ Communication partner: \_\_\_\_\_

Setting: \_\_\_\_\_

Support: \_\_\_\_\_

\_\_\_\_ / \_\_\_\_

Date: \_\_\_\_\_ Start: \_\_\_\_\_ Stop: \_\_\_\_\_

Activity: \_\_\_\_\_ Communication partner: \_\_\_\_\_

Setting: \_\_\_\_\_

Support: \_\_\_\_\_

\_\_\_\_ / \_\_\_\_

Date: \_\_\_\_\_ Start: \_\_\_\_\_ Stop: \_\_\_\_\_

Activity: \_\_\_\_\_ Communication partner: \_\_\_\_\_

Setting: \_\_\_\_\_

Support: \_\_\_\_\_

\_\_\_\_ / \_\_\_\_

Date: \_\_\_\_\_ Start: \_\_\_\_\_ Stop: \_\_\_\_\_

Activity: \_\_\_\_\_ Communication partner: \_\_\_\_\_

Setting: \_\_\_\_\_

Support: \_\_\_\_\_

\_\_\_\_ / \_\_\_\_
